# Supplementary material for: Unlocking MOF A520 synthesis: investigating critical parameters
Source: Royal Society of Chemistry journal article supplement (doi:10.1039/d5nj00496a), 2025-01-01
Supplement: d5nj00496a1.pdf [file d5nj00496a1.pdf]

### Supporting Information

#### Unlocking MOF A520 Synthesis: Investigating Critical Parameters

Marie Froehly,<sup>ab</sup> Gérald Chaplais,<sup>\*b</sup> Habiba Nouali,<sup>b</sup> Vincent Roucoules<sup>b</sup> and T. Jean Daou<sup>\*a</sup>

<sup>a</sup> APTAR CSP Technologies, F-67110 Niederbronn-les-Bains, France.

<sup>b</sup> Université de Haute-Alsace (UHA), Université de Strasbourg (UniStra), CNRS, Institut de Science des Matériaux de Mulhouse (IS2M), UMR 7361, Axe Matériaux à Porosité Contrôlée (MPC), F-68100 Mulhouse, France.

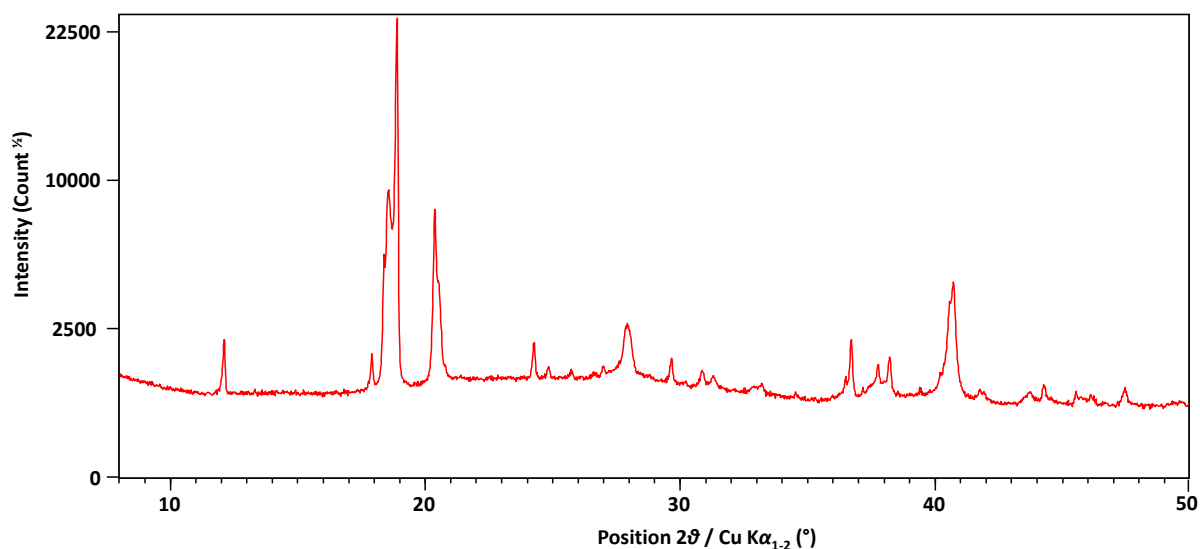

Figure S1. XRD patterns at wide  $2\theta$  angles (Cu  $K\alpha$  radiation) of Sample 1

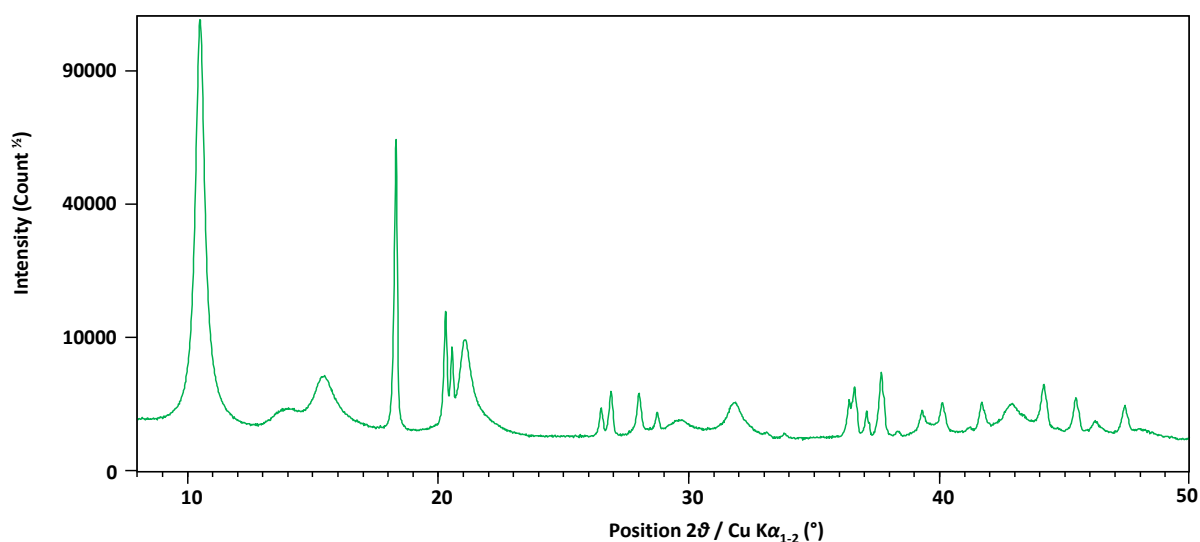

Figure S2. XRD patterns at wide  $2\theta$  angles (Cu  $K\alpha$  radiation) of Sample 2

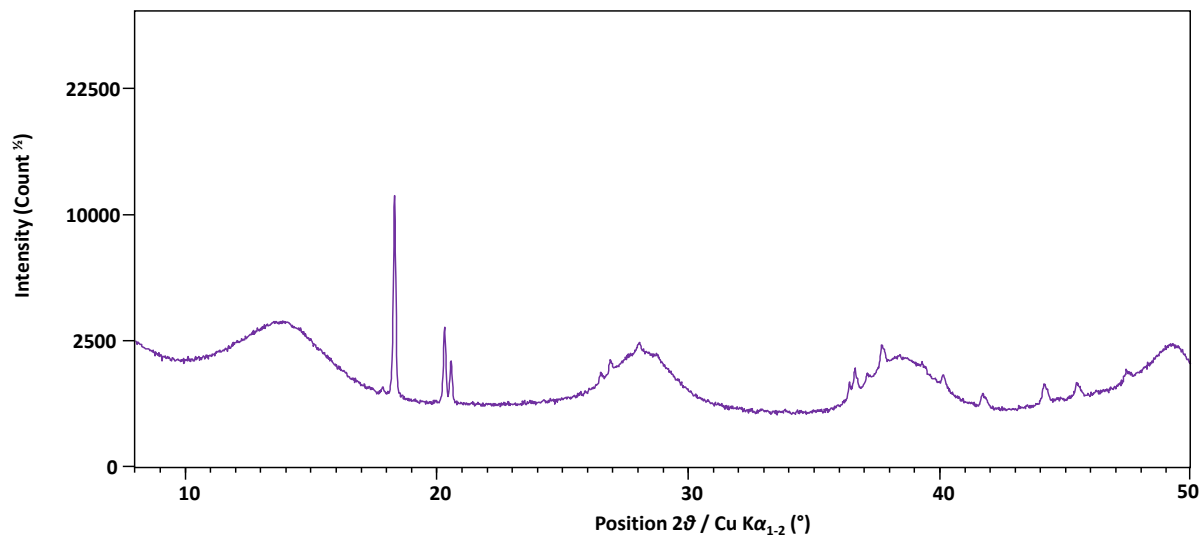

Figure S3. XRD patterns at wide  $2\theta$  angles (Cu  $K\alpha$  radiation) of Sample 3

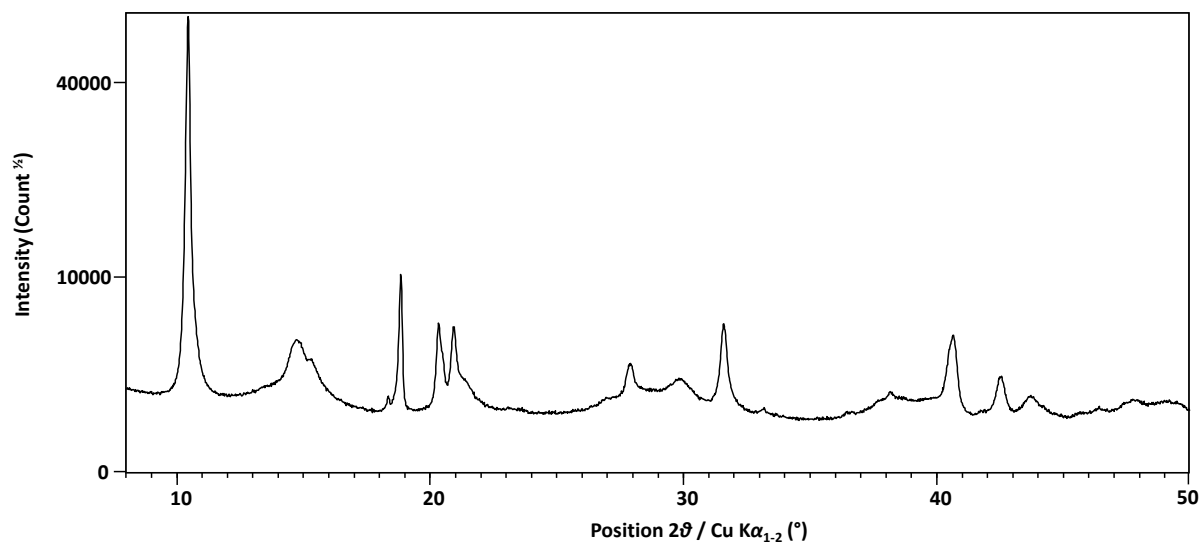

Figure S4. XRD patterns at wide  $2\theta$  angles (Cu  $K\alpha$  radiation) of Sample 4

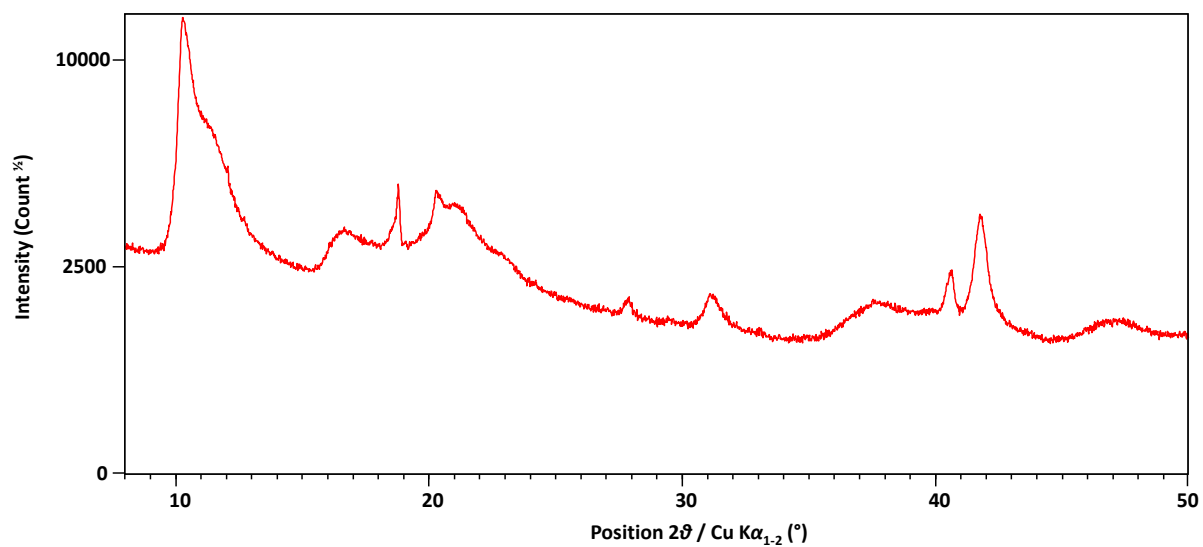

Figure S5. XRD patterns at wide  $2\theta$  angles (Cu  $K\alpha$  radiation) of Sample 5

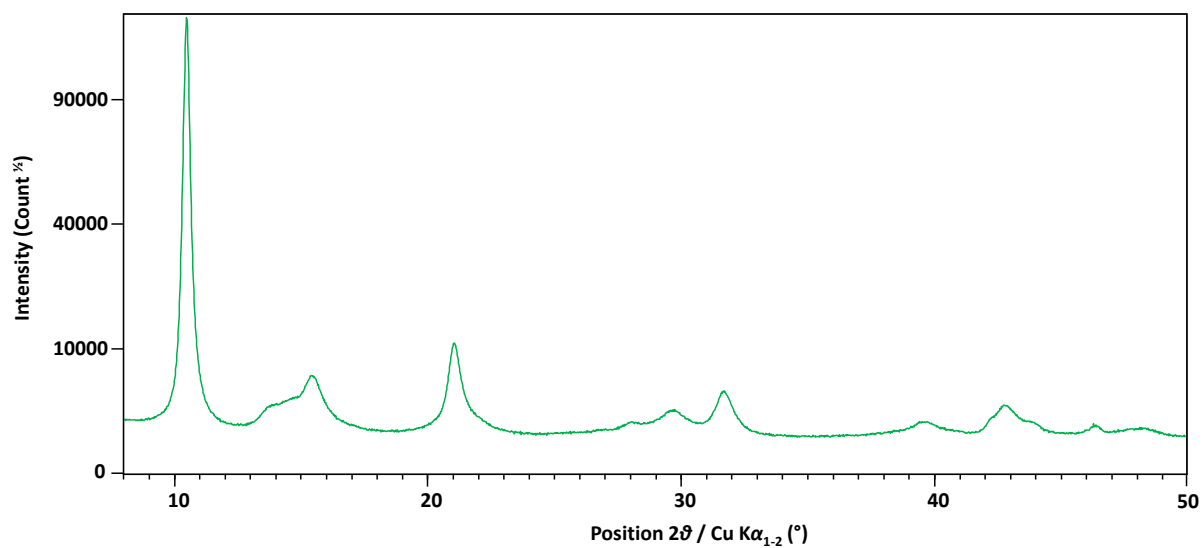

Figure S6. XRD patterns at wide  $2\theta$  angles (Cu  $K\alpha$  radiation) of Sample 6

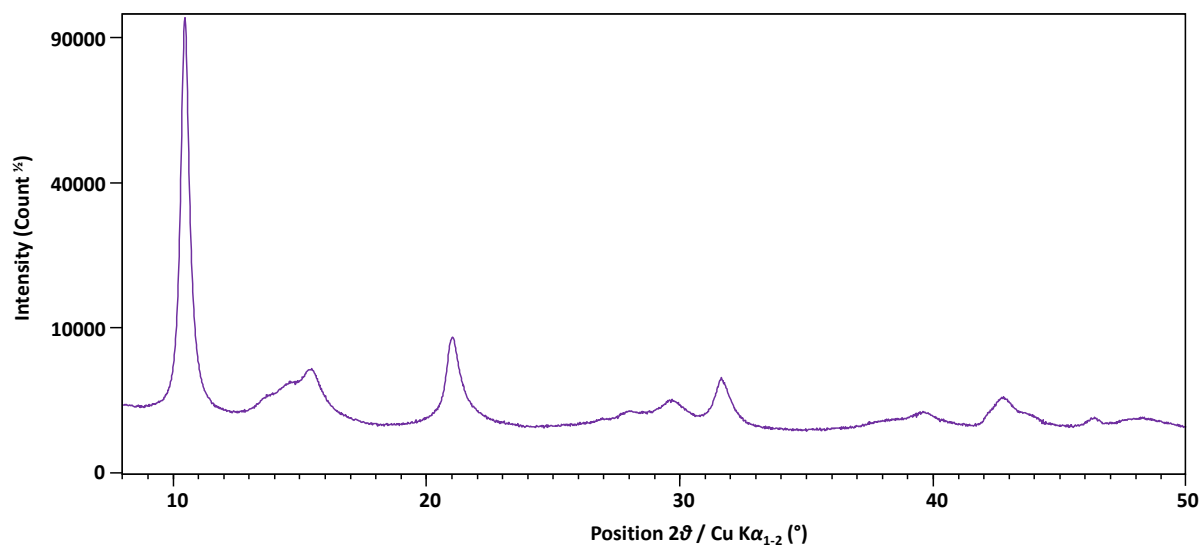

Figure S7. XRD patterns at wide  $2\theta$  angles ( $\text{Cu K}\alpha$  radiation) of Sample 7

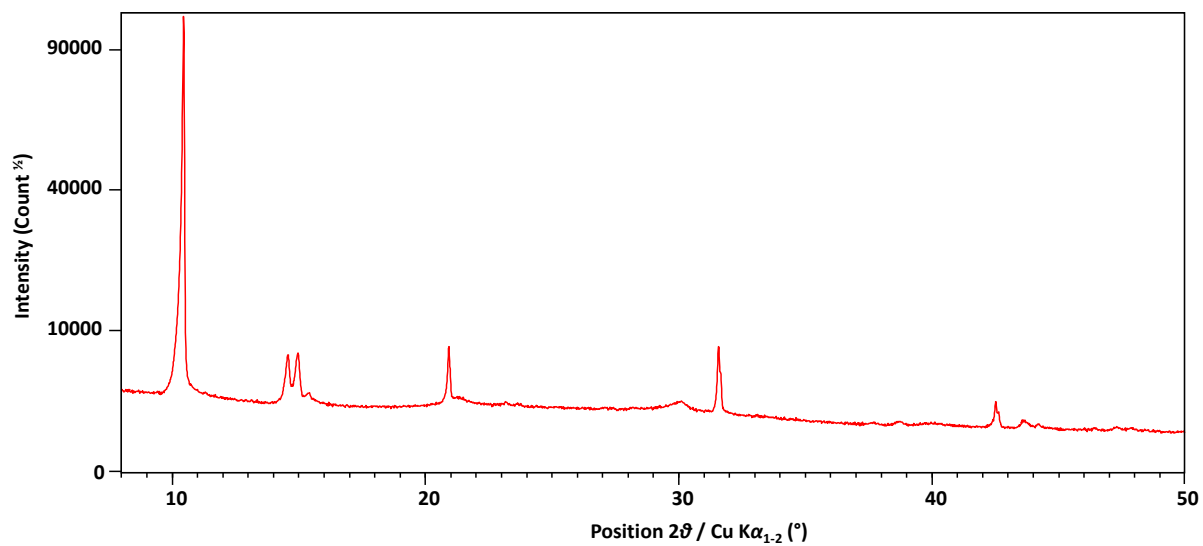

Figure S8. XRD patterns at wide  $2\theta$  angles ( $\text{Cu K}\alpha$  radiation) of Sample 8

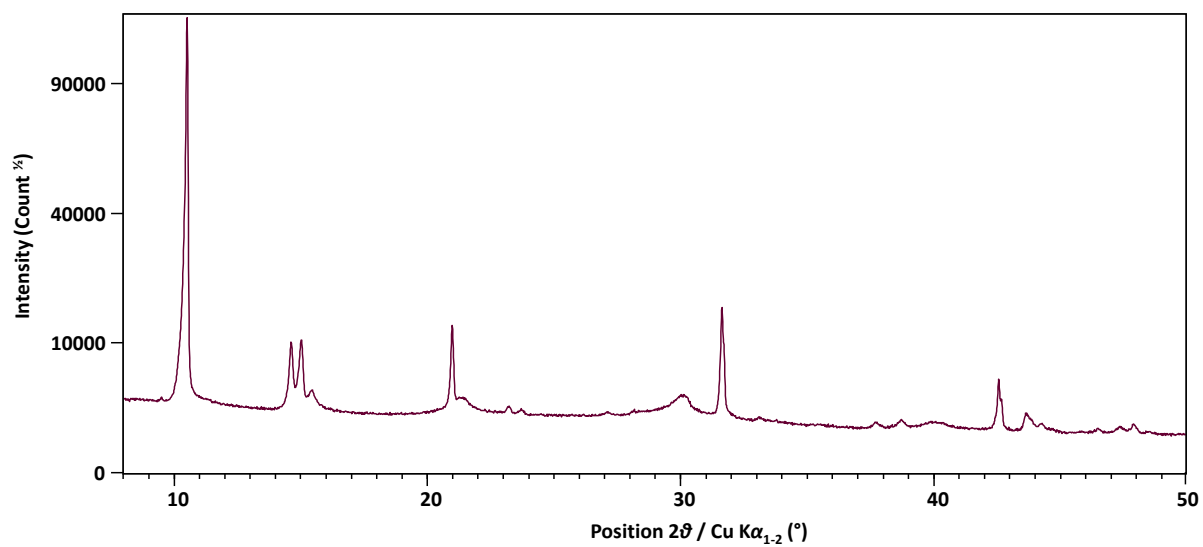

Figure S9. XRD patterns at wide  $2\theta$  angles (Cu  $K\alpha$  radiation) of Sample 9

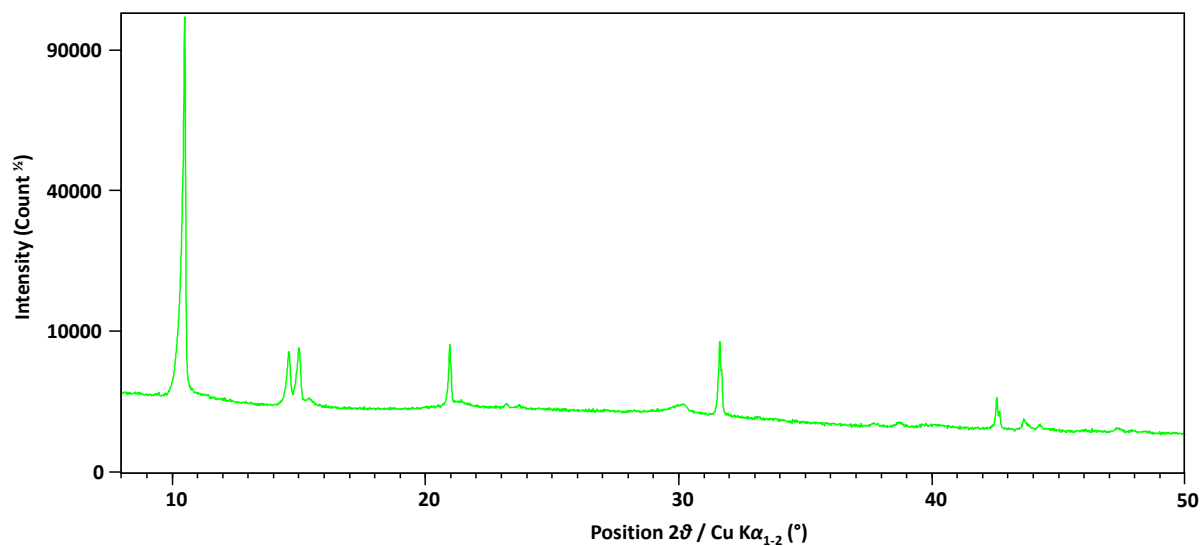

Figure S10. XRD patterns at wide  $2\theta$  angles (Cu  $K\alpha$  radiation) of Sample 10

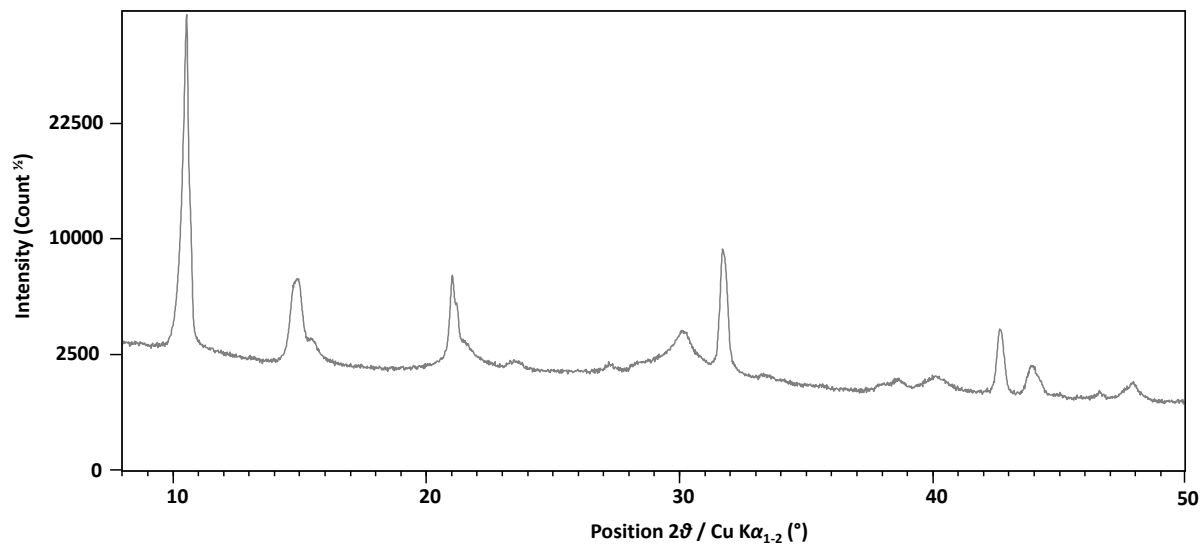

Figure S11. XRD patterns at wide  $2\theta$  angles (Cu  $K\alpha$  radiation) of Sample 11

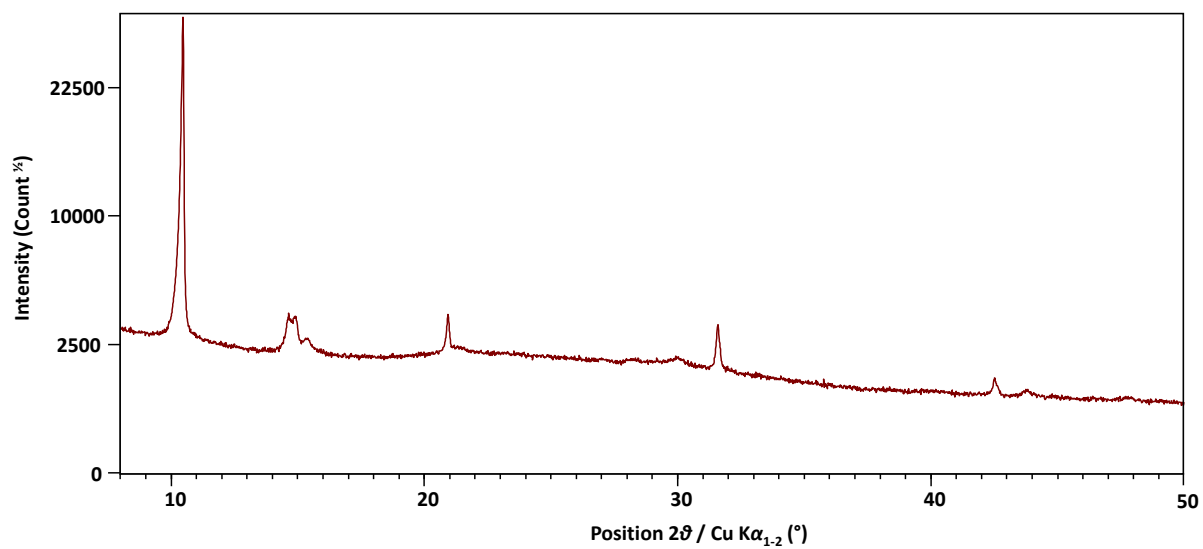

Figure S12. XRD patterns at wide  $2\theta$  angles (Cu  $K\alpha$  radiation) of Sample 12

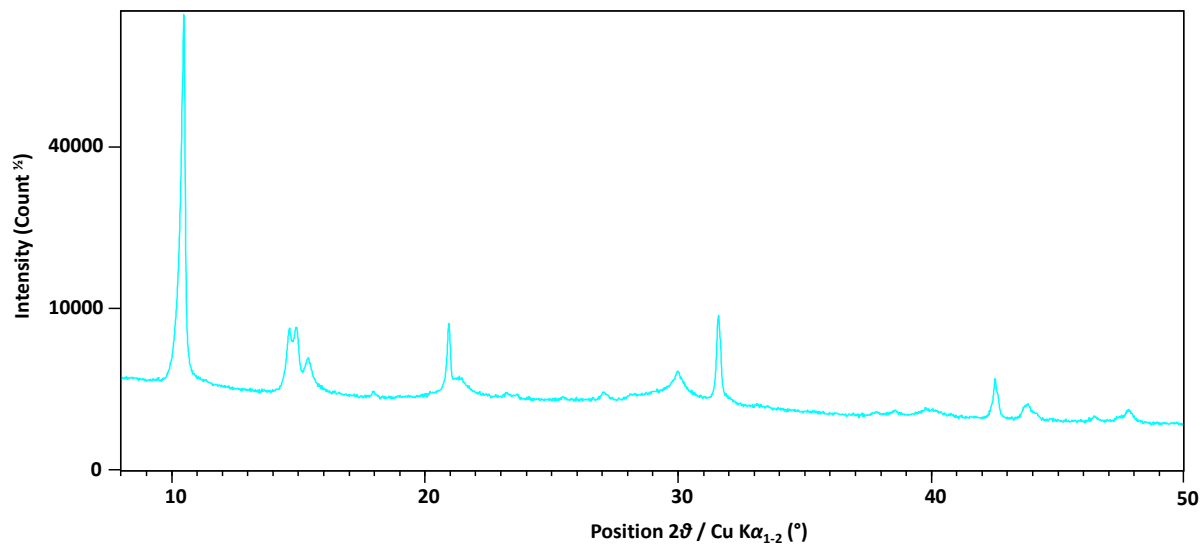

Figure S13. XRD patterns at wide  $2\theta$  angles (Cu  $K\alpha$  radiation) of Sample 13

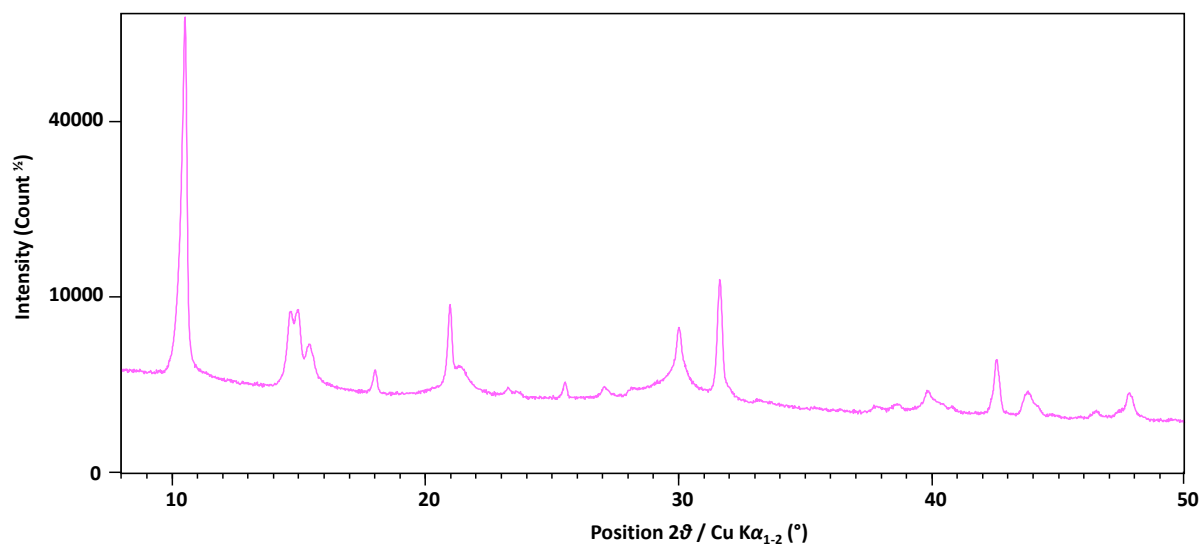

Figure S14. XRD patterns at wide  $2\theta$  angles (Cu  $K\alpha$  radiation) of Sample 14

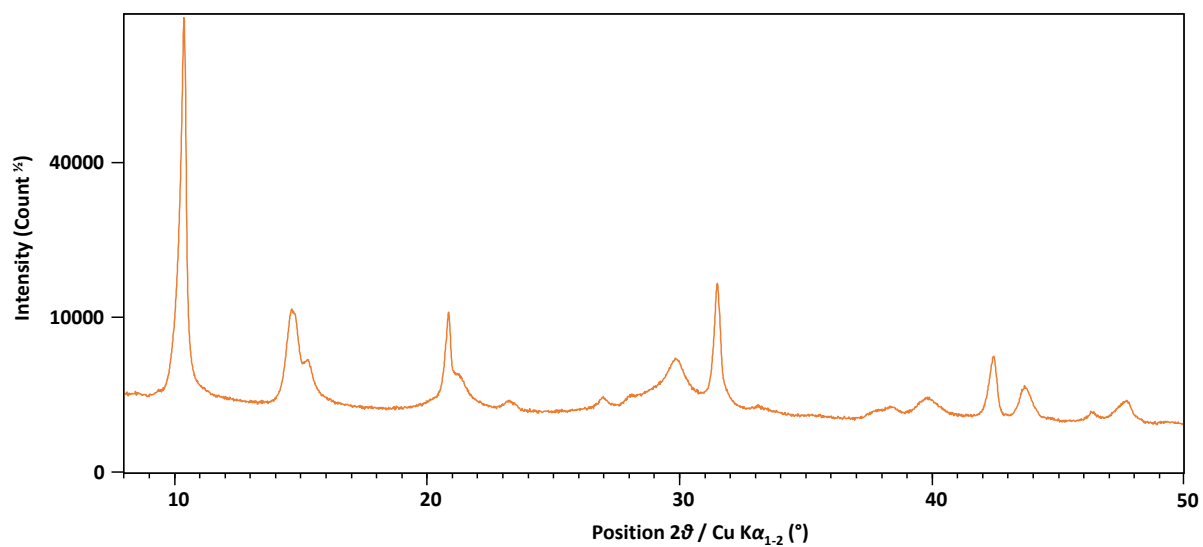

Figure S15. XRD patterns at wide  $2\theta$  angles (Cu  $K\alpha$  radiation) of Sample 15

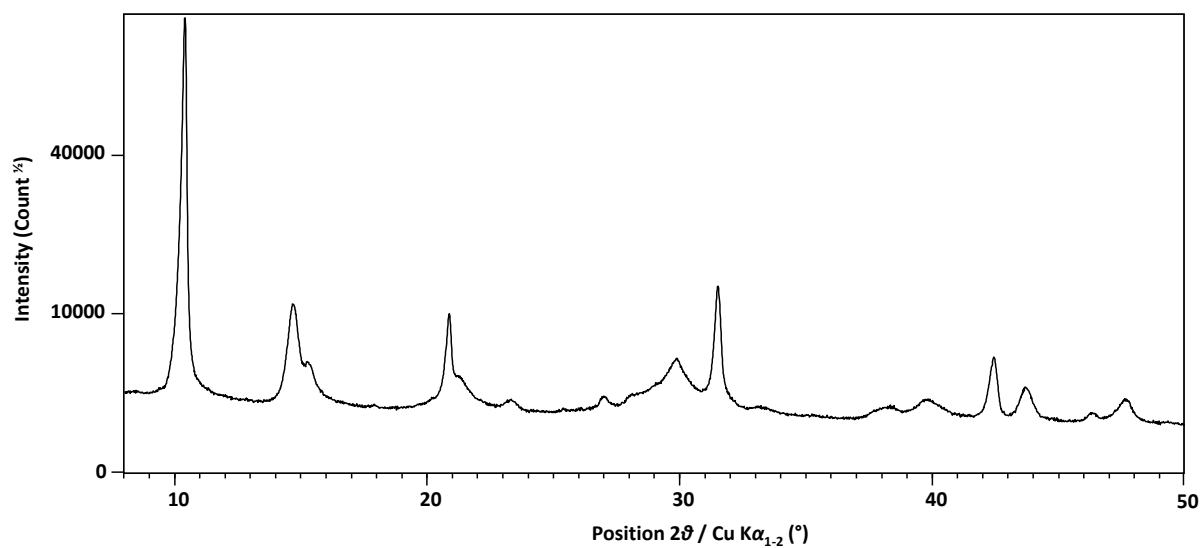

Figure S16. XRD patterns at wide  $2\theta$  angles (Cu  $K\alpha$  radiation) of Sample 16



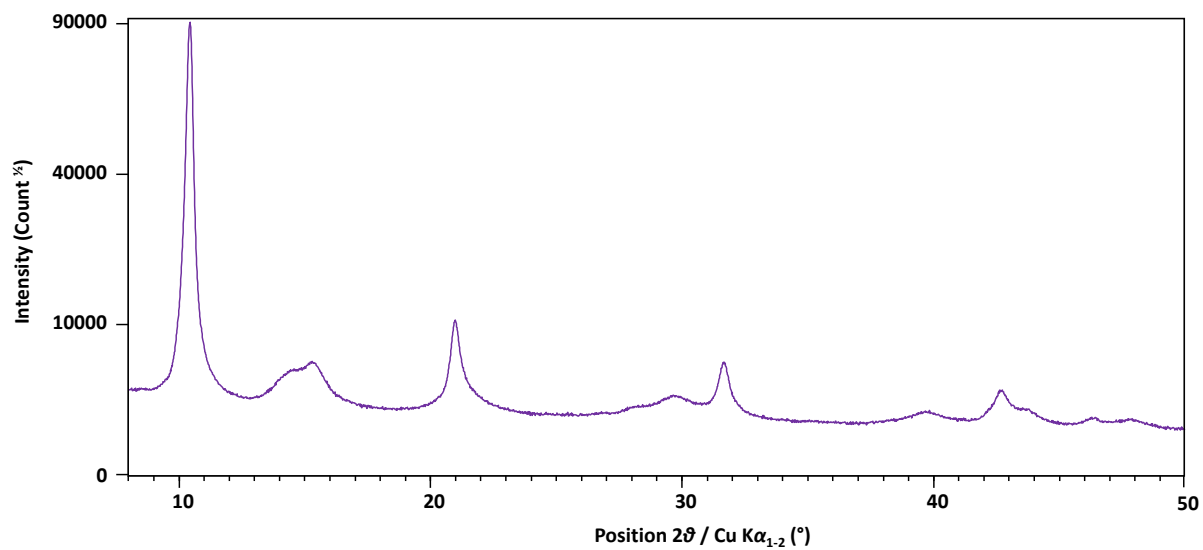

Figure S17. XRD patterns at wide  $2\theta$  angles (Cu  $K\alpha$  radiation) of Sample 17

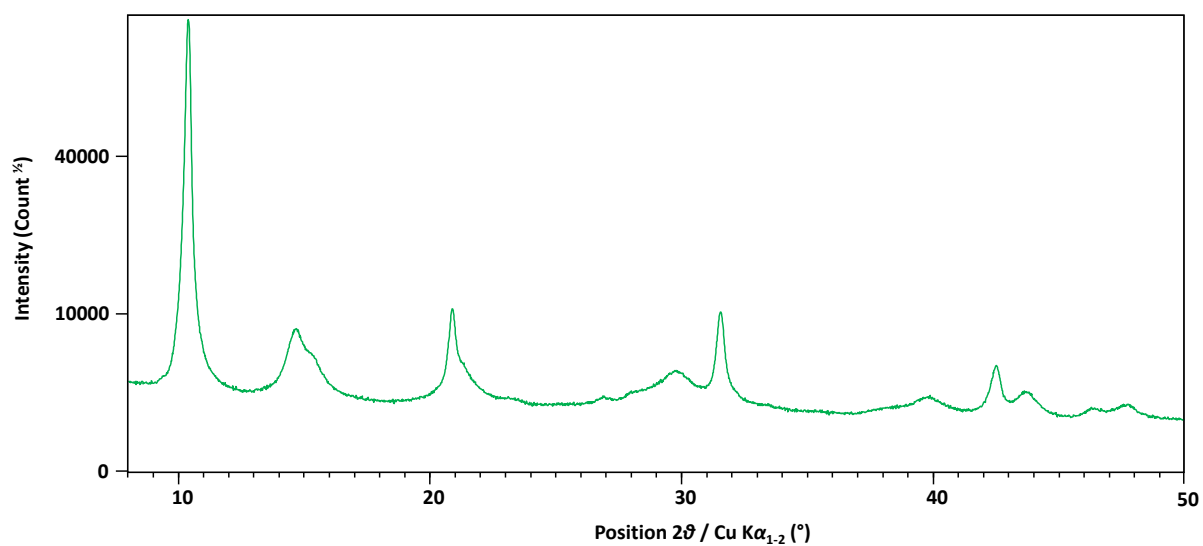

Figure S18. XRD patterns at wide  $2\theta$  angles (Cu  $K\alpha$  radiation) of Sample 18

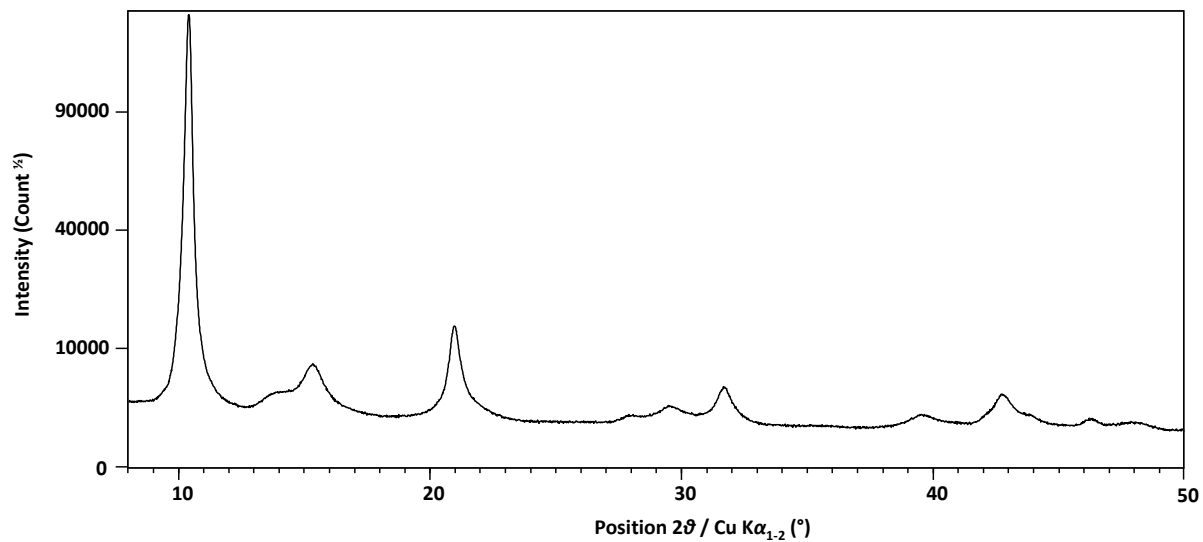

Figure S19. XRD patterns at wide  $2\theta$  angles (Cu  $K\alpha$  radiation) of the 10-factor scale-up sample (Trial 1)

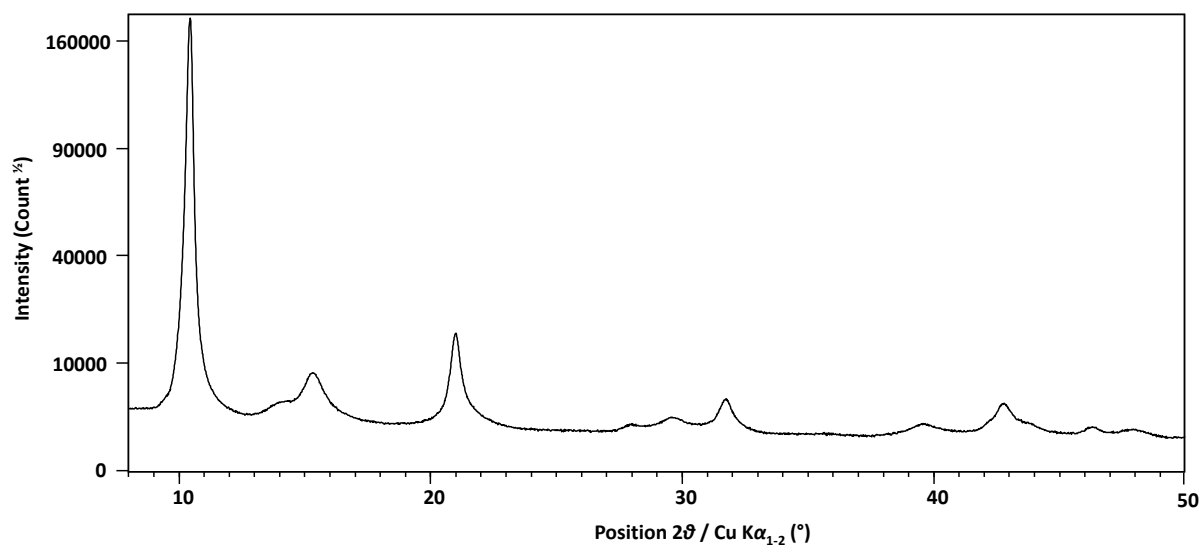

Figure S20. XRD patterns at wide  $2\theta$  angles (Cu  $K\alpha$  radiation) of the 10-factor scale-up sample (Trial 2)

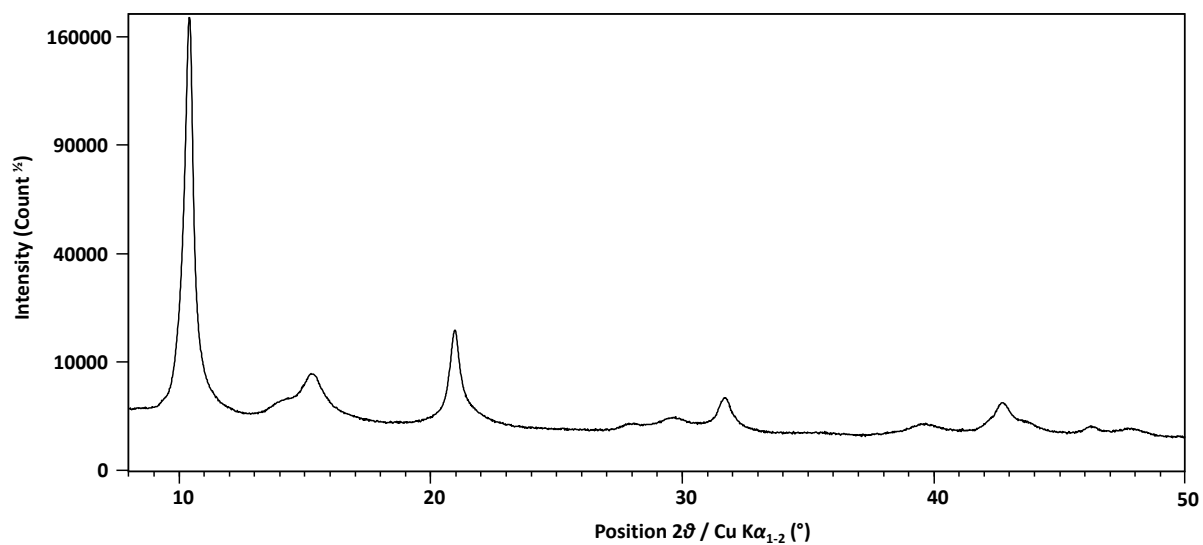

Figure S21. XRD patterns at wide  $2\theta$  angles (Cu  $K\alpha$  radiation) of the 10-factor scale-up sample (Trial 3)

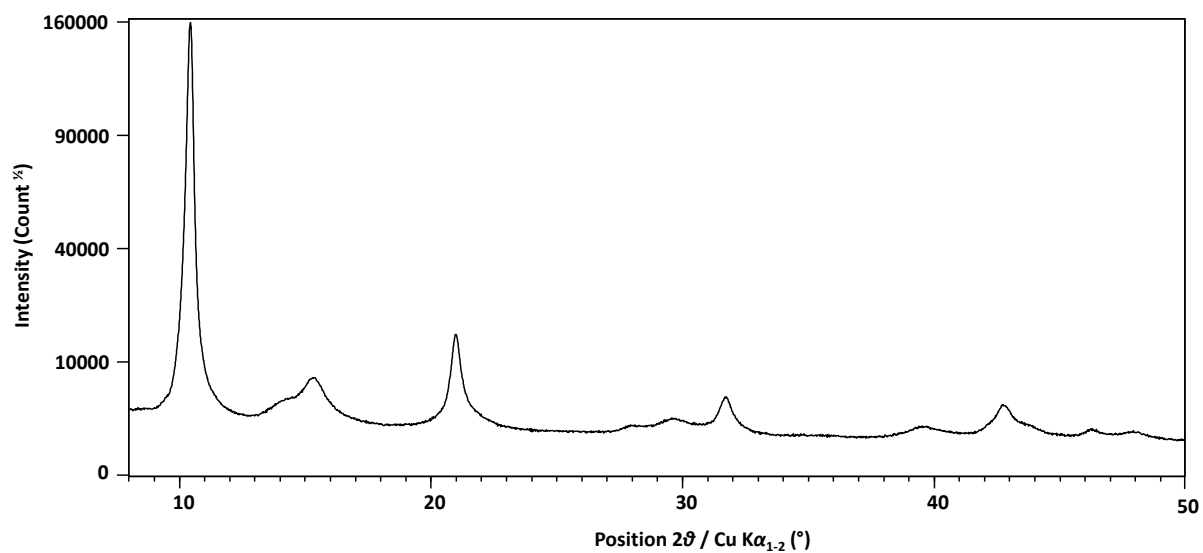

Figure S22. XRD patterns at wide  $2\theta$  angles (Cu  $K\alpha$  radiation) of the 10-factor scale-up sample (Trial 4)

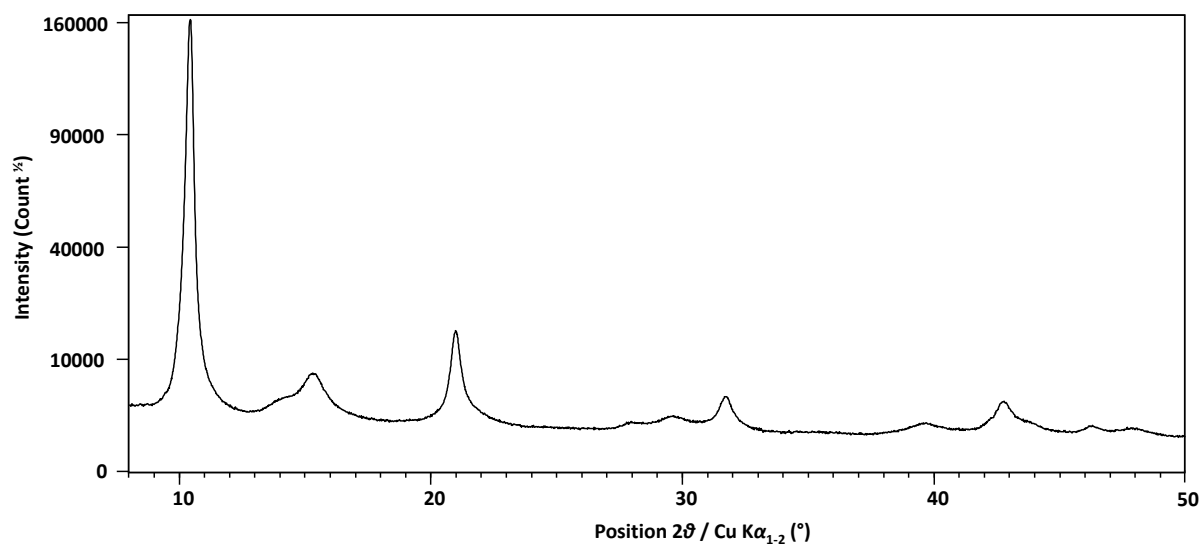

Figure S23. XRD patterns at wide  $2\theta$  angles (Cu  $K\alpha$  radiation) of the 10-factor scale-up sample (Trial 5)

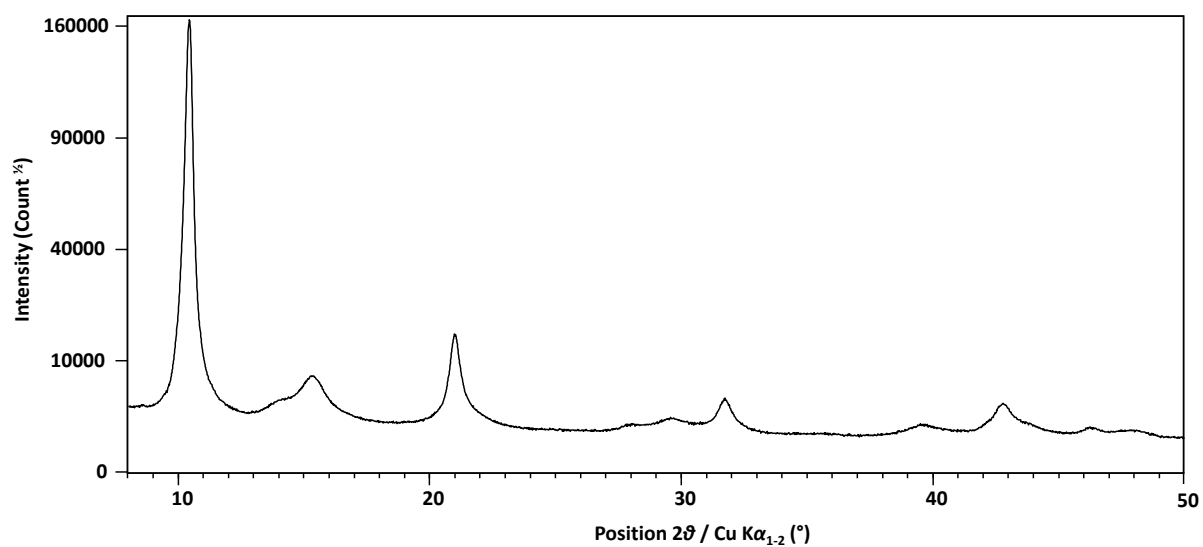

Figure S24. XRD patterns at wide  $2\theta$  angles (Cu  $K\alpha$  radiation) of the 10-factor scale-up sample (Trial 6)

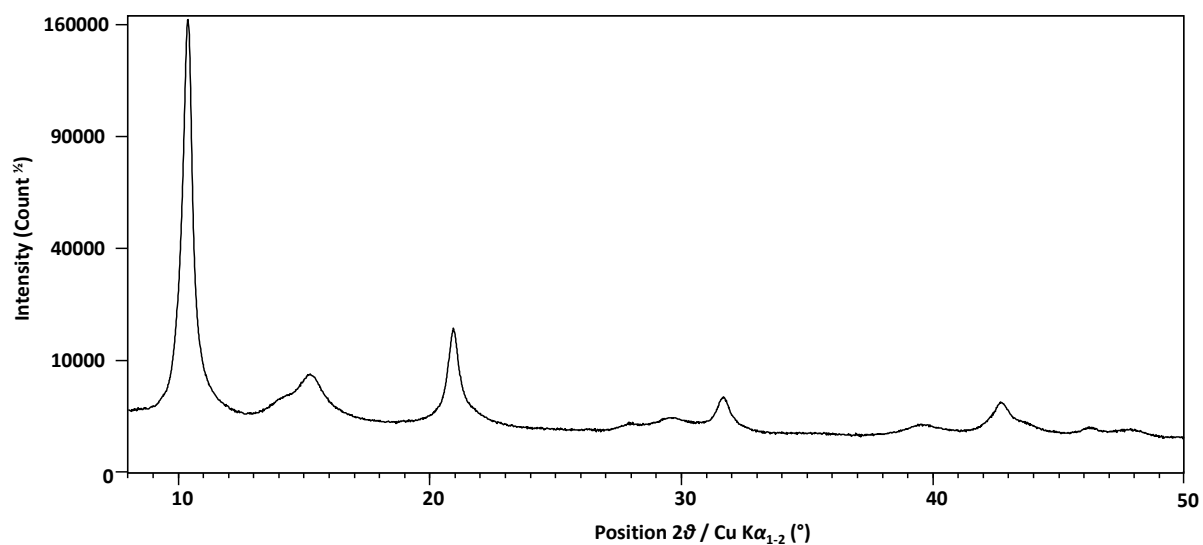

Figure S25. XRD patterns at wide  $2\theta$  angles (Cu  $K\alpha$  radiation) of the 10-factor scale-up sample (Trial 7)

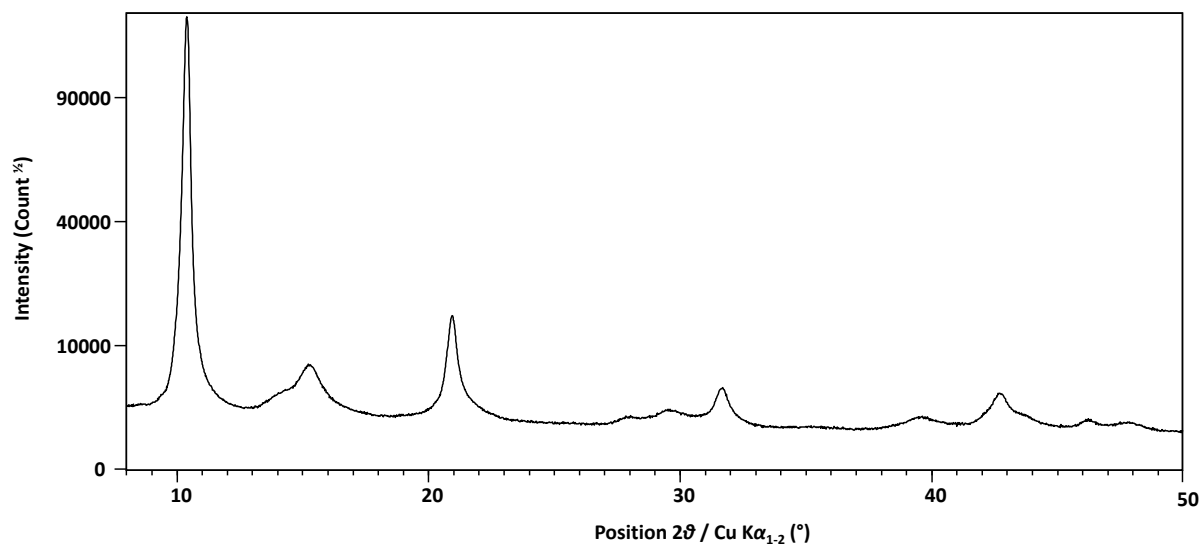

Figure S26. XRD patterns at wide  $2\theta$  angles (Cu  $K\alpha$  radiation) of the 10-factor scale-up sample (Trial 8)

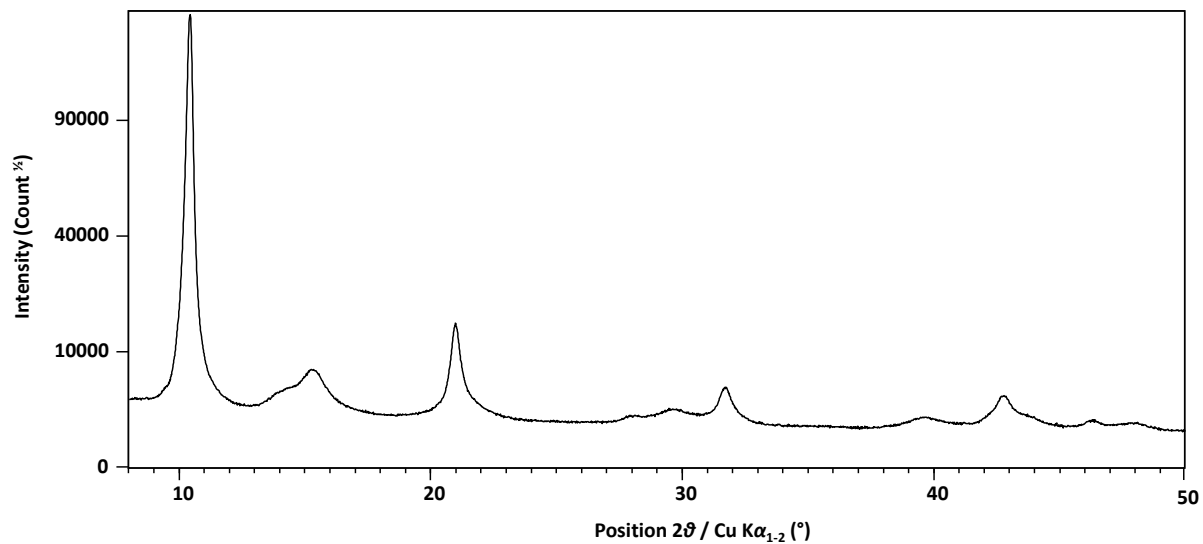

Figure S27. XRD patterns at wide  $2\theta$  angles (Cu  $K\alpha$  radiation) of the 10-factor scale-up sample (Trial 9)

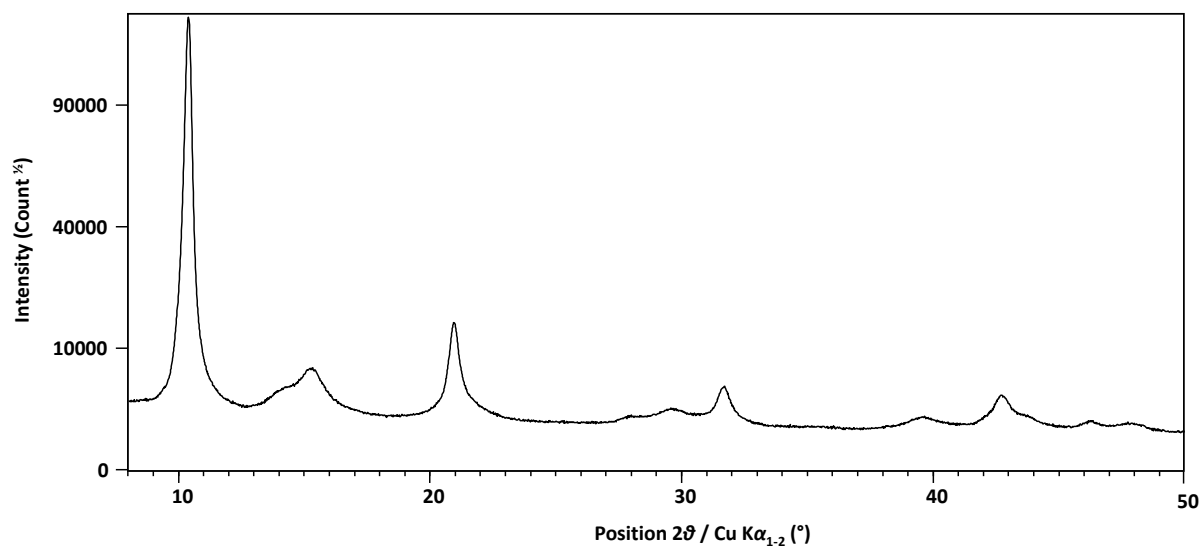

Figure S28. XRD patterns at wide  $2\theta$  angles (Cu  $K\alpha$  radiation) of the 10-factor scale-up sample (Trial 10)

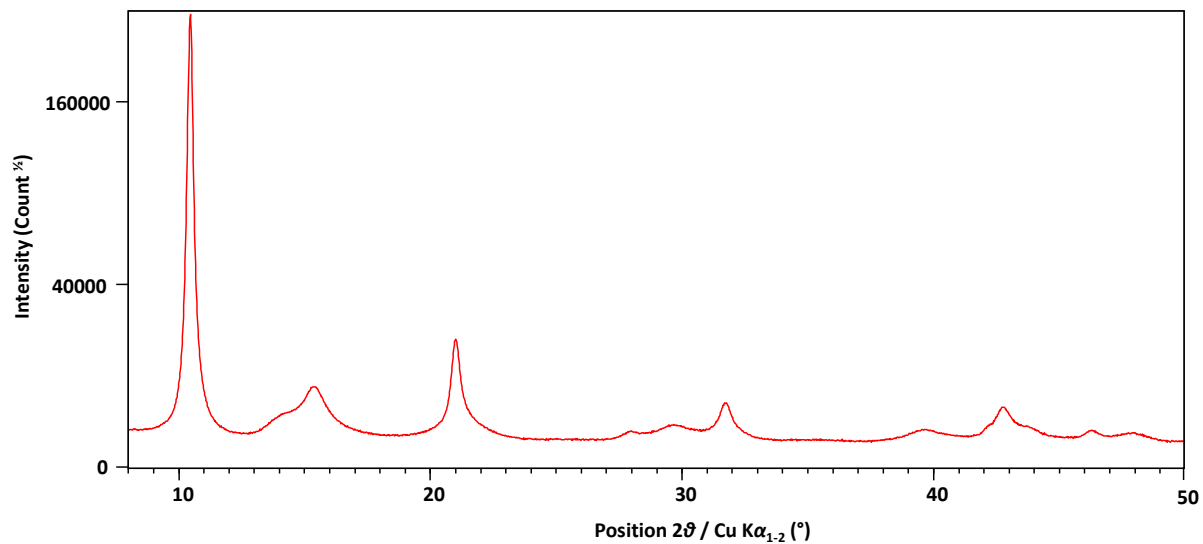

Figure S29. XRD patterns at wide  $2\theta$  angles (Cu  $K\alpha$  radiation) of the 100-factor scale-up sample
